# Supplementary material
Source: HighWire-hosted journal article supplement (https://www.cmaj.ca/highwire/filestream/147026/field_highwire_adjunct_files/6/220508-res-7-at.pdf)

## Digital Supplement 3 FM Family-Reported Bereavement Resources

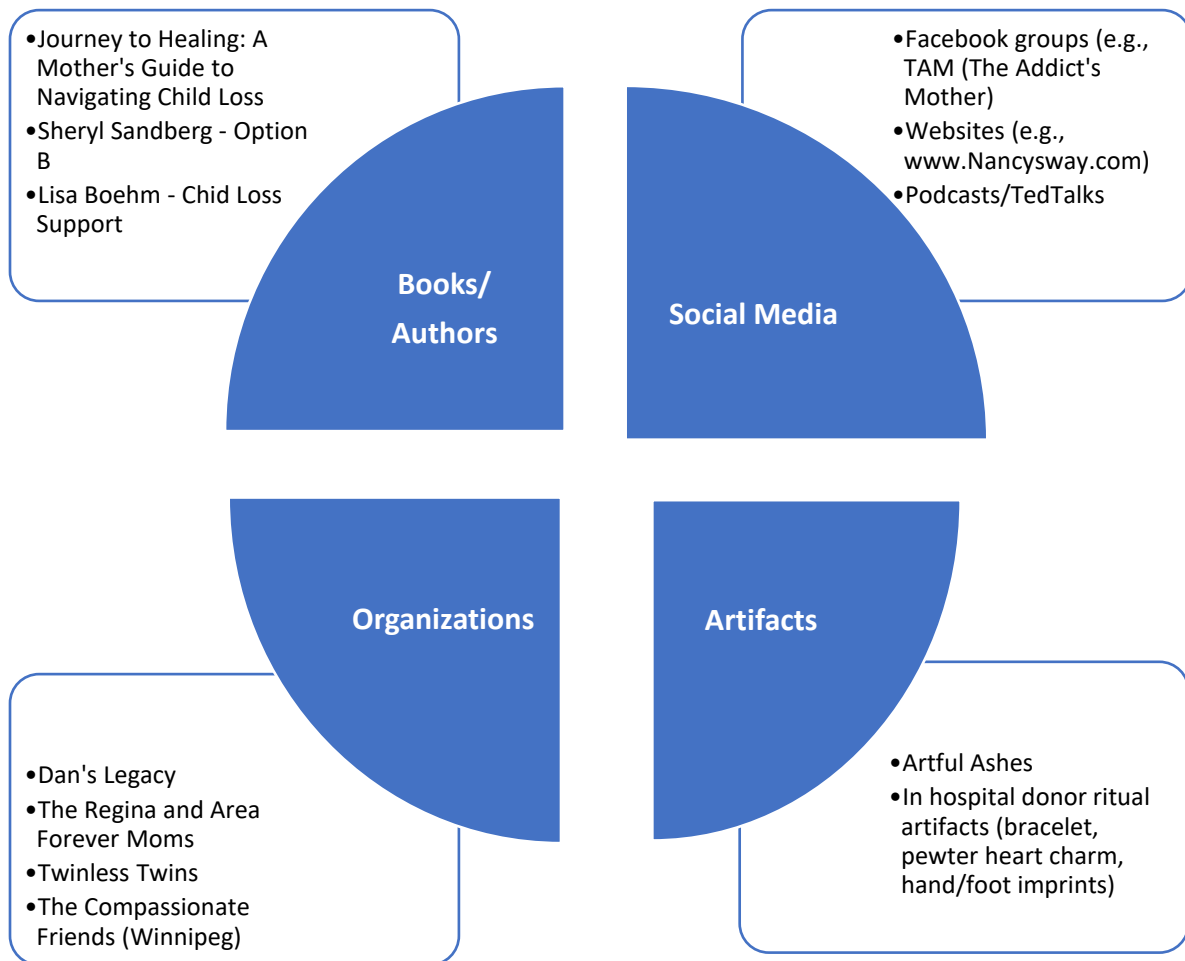

Supplement: 220508-res-7-at.pdf [file 220508-res-7-at.pdf]
